# Supplementary material for: Photolytic splitting of homodimeric quinone-derived oxetanes studied by ultrafast transient absorption spectroscopy and quantum chemistry
Source: Royal Society of Chemistry journal article supplement (doi:10.1039/d4cp00830h), 2024-01-01
Supplement: d4cp00830h1.pdf [file d4cp00830h1.pdf]

## Electronic Supplementary Information

# Photolytic splitting of homodimeric quinone-derived oxetanes studied by ultrafast transient absorption spectroscopy and quantum chemistry

Alejandro Blasco-Brusola, Lorena Tamarit, Miriam Navarrete-Miguel, Daniel Roca-Sanjuán, Miguel A. Miranda, Ignacio Vayá

### Table of contents

#### Computational details

**Fig. S1**  $^1\text{H}$ - and  $^{13}\text{C}$ -NMR for BQ-Ox in  $\text{CDCl}_3$ .

**Fig. S2**  $^1\text{H}$ - and  $^{13}\text{C}$ -NMR for NQ-Ox in  $\text{CDCl}_3$ .

**Fig. S3** Chromatograms of non-irradiated and irradiated BQ-Ox (A) and NQ-Ox (B) followed by analytical HPLC using a Photodiode Array Detector (wavelength fixed at 252 nm). Irradiations were performed in deaerated MeCN in a multilamp photoreactor emitting at  $\lambda_{\text{max}} \sim 310$  nm through quartz cells.

**Fig. S4** LFP transient absorption spectra for BQ at different times after the laser pulse (1, 2, 10 and 50  $\mu\text{s}$ ). B) Decay traces for BQ (gray) and BQ-Ox (dark blue) at 410 nm. All measurements were performed in deaerated MeCN at  $\lambda_{\text{exc}} = 266$  nm.

**Fig. S5** Natural orbitals of the CASSCF active space of the singlet states at the oxetane structure for BQ-Ox.

**Fig. S6** Natural orbitals of the CASSCF active space of the triplet states at the oxetane structure for BQ-Ox.

**Fig. S7** Natural orbitals of the CASSCF active space of the singlet and triplet states at the diradical structure ( $^3\text{BQ-Ox}^*$ ) for BQ-Ox.

**Fig. S8** Natural orbitals of the CASSCF active space of the singlet and triplet states at the transition state structure (TS) for BQ-Ox.

**Fig. S9** Natural orbitals of the CASSCF active space of the singlet and triplet states at the excimer structure ( $^3\text{EXC}^*$ ) for BQ-Ox.

**Fig. S10** Natural orbitals of the CASSCF active space of the singlet and triplet states at the crossing point structure (CP) for BQ-Ox.

**Fig. S11** A) LFP transient absorption spectra for NQ at different times after the laser pulse (0.5, 2, 5 and 20  $\mu$ s). B) Decay traces for NQ (black) and NQ-Ox (blue) at 370 nm. All measurements were performed in deaerated MeCN at  $\lambda_{exc} = 266$  nm.

**Fig. S12** Degree of photodegradation for NQ (black) and NQ-Ox (blue) upon steady-state irradiation in deaerated MeCN using a multilamp photoreactor emitting at  $\lambda_{max} \sim 310$  nm.

**Fig. S13** Natural orbitals of the CASSCF active space of the singlet states at the oxetane structure for NQ-Ox.

**Fig. S14** Natural orbitals of the CASSCF active space of the triplet states at the oxetane structure for NQ-Ox.

**Fig. S15** Natural orbitals of the CASSCF active space of the singlet and triplet states at the diradical structure ( $^3NQ-Ox^*$ ) for NQ-Ox.

**Fig. S16** Natural orbitals of the CASSCF active space of the singlet states at the crossing point structure (CP) for NQ-Ox.

**Fig. S17** Natural orbitals of the CASSCF active space of the triplet states at the crossing point structure (CP) for NQ-Ox.

**Fig. S18** Natural orbitals of the CASSCF active space of the singlet states at the transition state structure (TS) for NQ-Ox.

**Fig. S19** Natural orbitals of the CASSCF active space of the triplet states at the transition state structure (TS) for NQ-Ox.

**Fig. S20** Natural orbitals of the CASSCF active space of the singlet and triplet states at the excimer structure ( $^3EXC^*$ ) for NQ-Ox.

**Fig. S21** T-shape and parallel conformations of the  $^3EXC^*$  for BQ-Ox system.

**Fig. S22** T-shape and parallel conformations of the  $^3EXC^*$  for NQ-Ox system.

**Table S1** Nature of the states in each relevant geometry for BQ-Ox: energies ( $E_v^{abs}$ ; in eV), weight of the main configuration state functions in the CASSCF wavefunction and dipole moment ( $\mu$ ; in Debye). See shape of the natural orbitals in Figs. S4 to S9.

**Table S2** Nature of the states in each relevant geometry for NQ-Ox: energies ( $E_v^{abs}$ ; in eV), weight of the main configuration state functions in the CASSCF wavefunction and dipole moment ( $\mu$ ; in Debye). See shape of the natural orbitals in Figs. S11 to S18.

**Table S3** DFT and CASPT2 energies of the  $T_1$  state of both types of excimers of BQ-Ox and NQ-Ox. The energies are relative to their respective T-shape excimers.

## Computational details

The calculations of this work were performed by means of Density Functional Theory (DFT) and multiconfigurational quantum chemistry (CASSCF<sup>1</sup> and CASPT2<sup>2</sup>) methods, using GAUSSIAN 09, revision D.01,<sup>3</sup> and MOLCAS 8<sup>4</sup> software packages, respectively.

**Geometry optimizations.** The structures of the singlet ground state of the oxetanes (BQ-Ox/NQ-Ox), the triplet state of the diradical (<sup>3</sup>BQ-Ox\*/<sup>3</sup>NQ-Ox\*), the triplet state of the exciplex (<sup>3</sup>EXC\*), the triplet transition state (TS) between the diradical and the exciplex and the isolated BQ molecules were optimized using the DFT method with the M06-2X functional, without any symmetry restriction and the standard 6-31++G\*\* basis set.

On the one hand, a series of intermediate geometries between BQ-Ox/NQ-Ox and <sup>3</sup>BQ-Ox\*/<sup>3</sup>NQ-Ox\* were obtained by scanning the C-C bond length. On the other hand, the intermediate geometries between <sup>3</sup>BQ-Ox\*/<sup>3</sup>NQ-Ox\*, TS and <sup>3</sup>EXC\* were determined by means of internal reaction coordinate calculations (IRC) from the TS. All of them were obtained with the DFT method and M06-2X/6-31++G\*\* level of theory.

**Excited-state single-point calculations.** The ground- and excited-state energies on top of the optimized and scanned geometries were calculated using the state specific (SS)-CASPT2 method, which incorporates dynamic correlation, making use of the state averaged (SA)-CASSCF wave functions. In the case of BQ-Ox system, the active space used in the study was of 14 electrons distributed in 12 orbitals, demanding four singlet and four triplet states in the SA-CASSCF procedure and with the ANO-S-VDZP basis set, as implemented in MOLCAS 8 software package. For NQ-Ox, the active space was 12 electrons distributed in 12 orbitals and, in this case, three singlet and three triplet states were demanded. To ensure accuracy, the ionization-potential electron-affinity parameter<sup>5</sup> (IPEA) was set at 0.0 au in both systems. To minimize the presence of weakly intruder states, an imaginary level shift<sup>6</sup> of 0.2 au was applied.

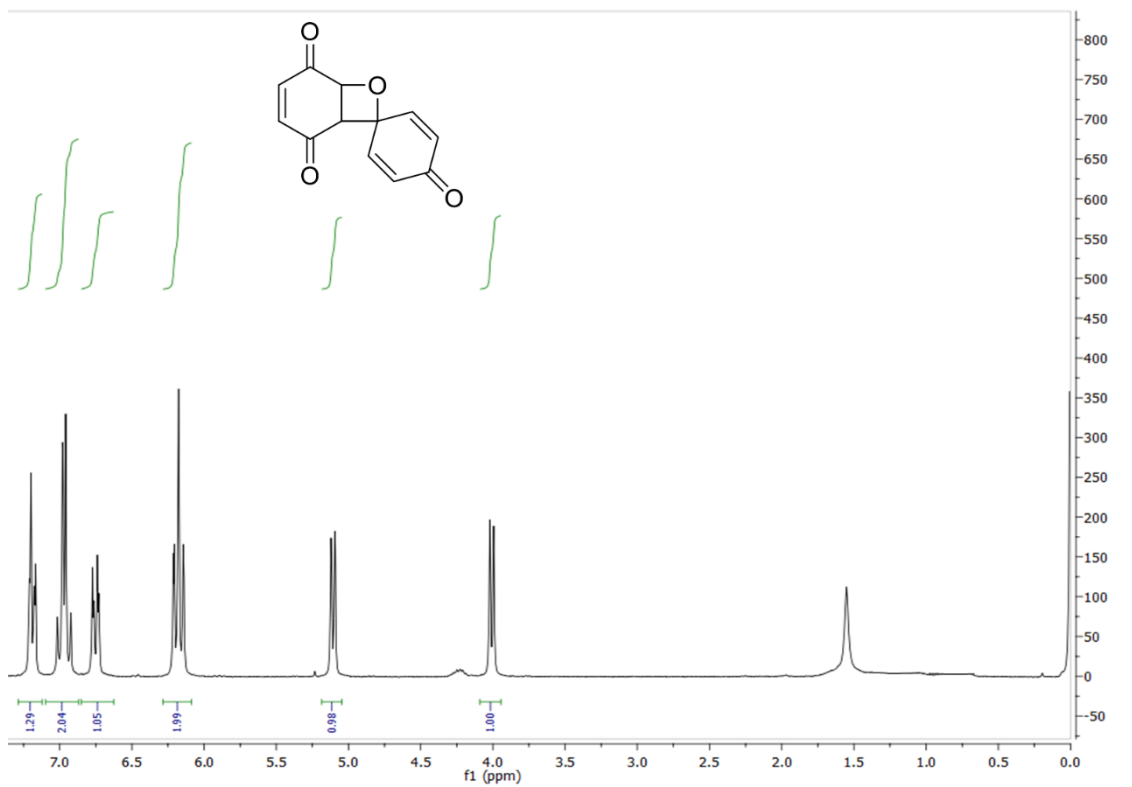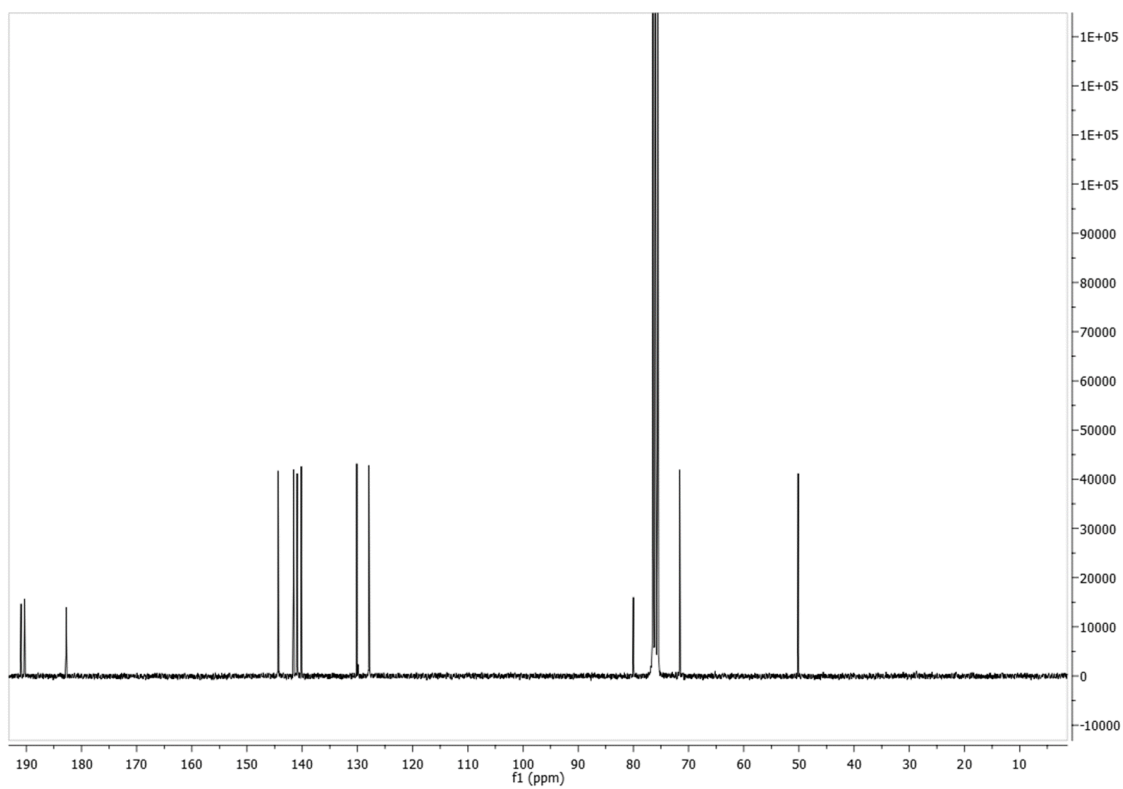

**Fig. S1** <sup>1</sup>H- and <sup>13</sup>C-NMR for BQ-Ox in CDCl<sub>3</sub>.

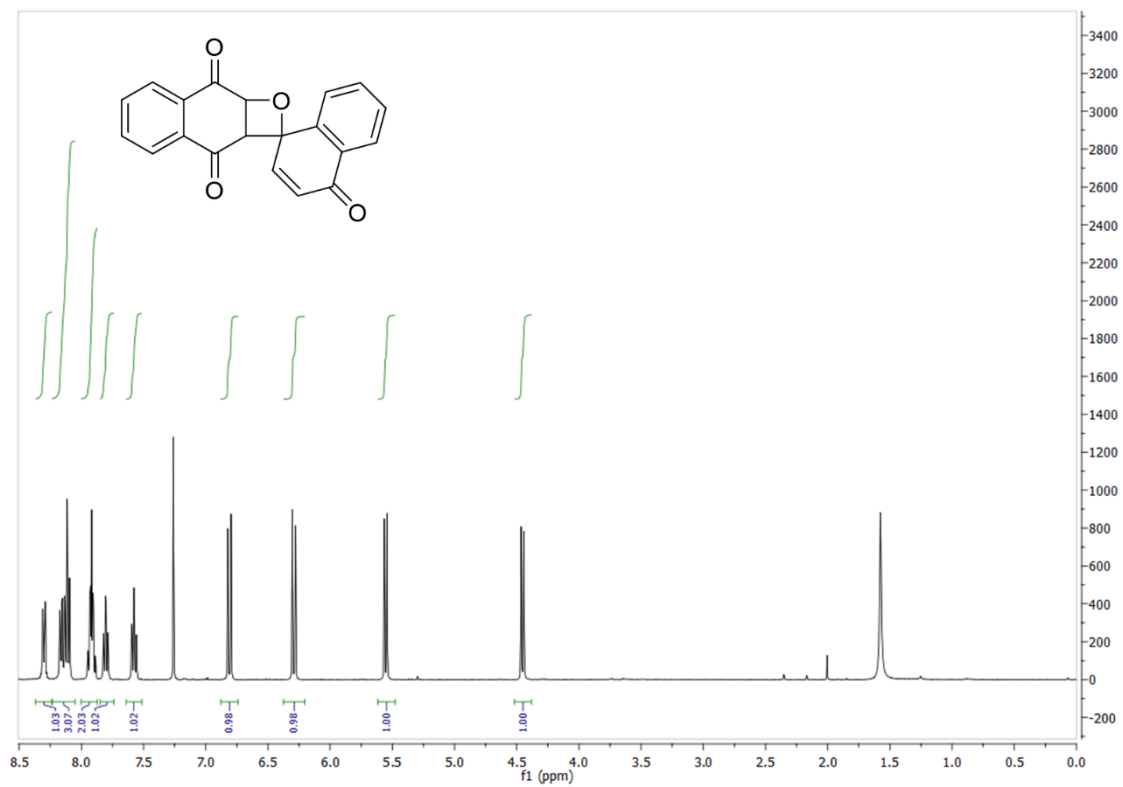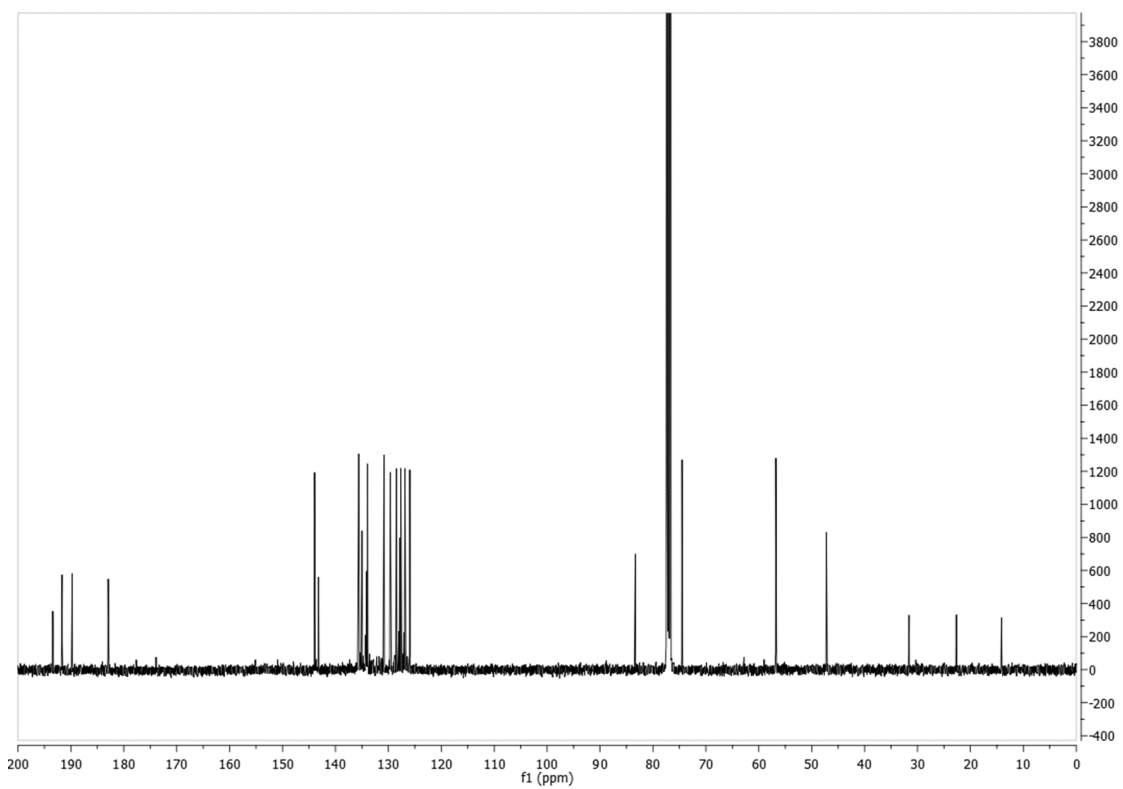

Fig. S2  $^1\text{H}$ - and  $^{13}\text{C}$ -NMR for NQ-Ox in  $\text{CDCl}_3$ .

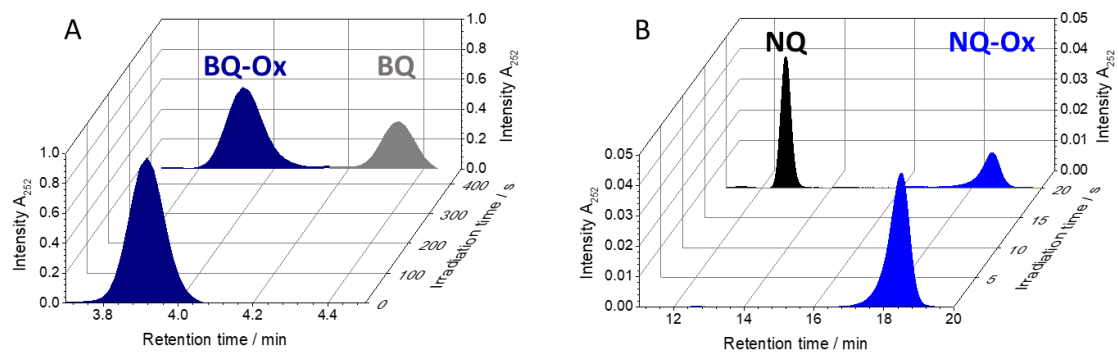

**Fig. S3** Chromatograms of non-irradiated and irradiated BQ-Ox (A) and NQ-Ox (B) followed by analytical HPLC using a Photodiode Array Detector (wavelength fixed at 252 nm). Irradiations were performed in deaerated MeCN in a multilamp photoreactor emitting at  $\lambda_{\text{max}} \sim 310$  nm through quartz cells.

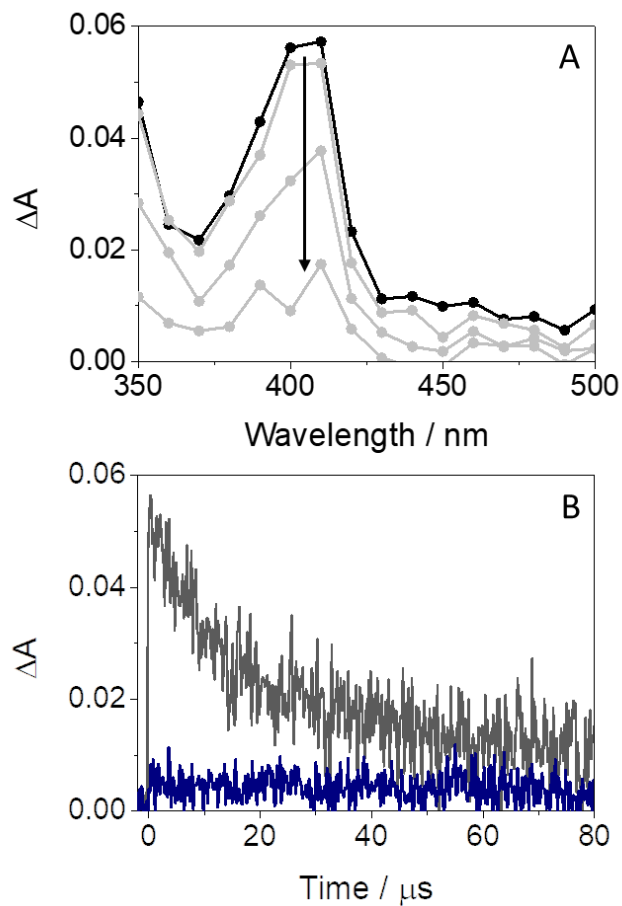

**Fig. S4** LFP transient absorption spectra for BQ at different times after the laser pulse (1, 2, 10 and 50  $\mu$ s). B) Decay traces for BQ (gray) and BQ-Ox (dark blue) at 410 nm. All measurements were performed in deaerated MeCN at  $\lambda_{exc} = 266$  nm.

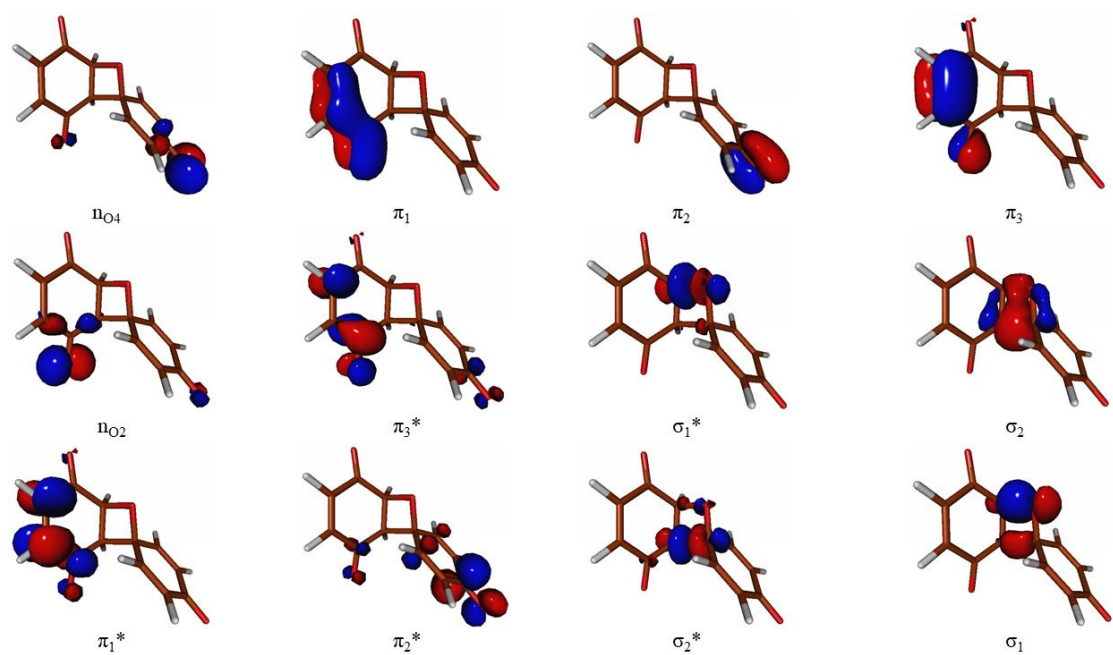

**Fig. S5** Natural orbitals of the CASSCF active space of the singlet states at the oxetane structure for BQ-Ox.



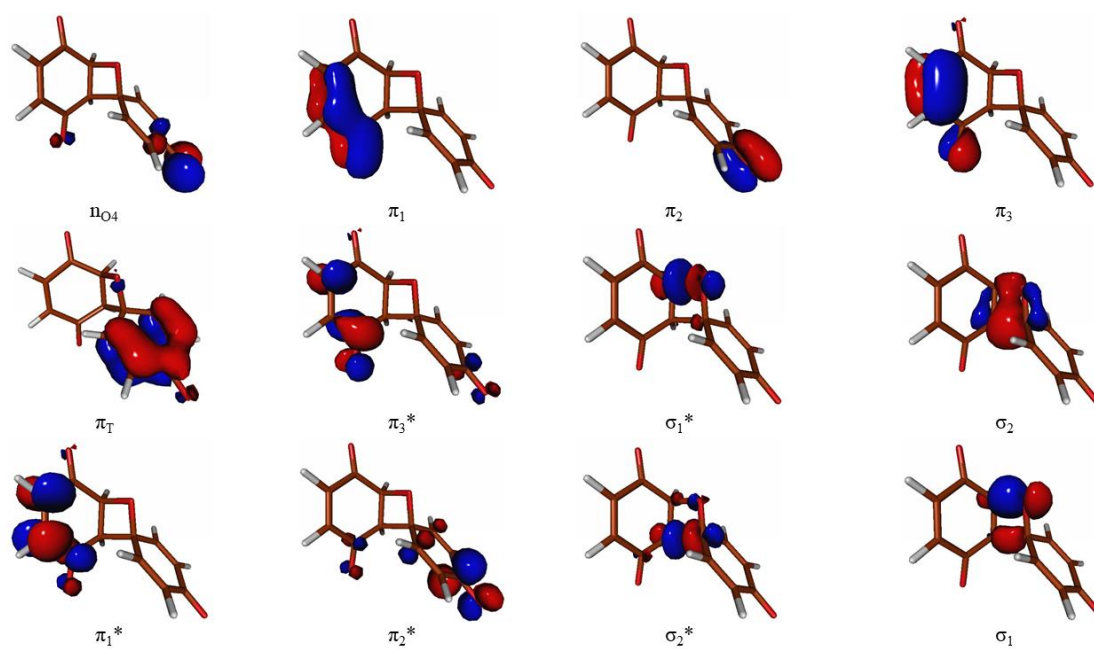

**Fig. S6** Natural orbitals of the CASSCF active space of the triplet states at the oxetane structure for BQ-Ox.

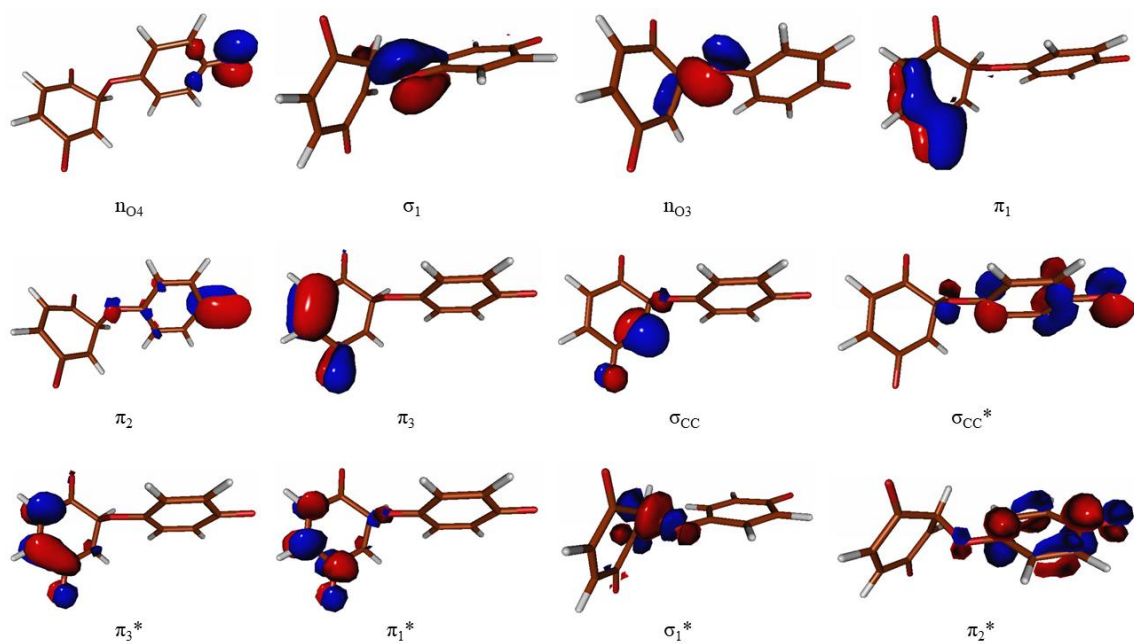

**Fig. S7** Natural orbitals of the CASSCF active space of the singlet and triplet states at the diradical structure ( ${}^3\text{BQ-Ox}^*$ ) for BQ-Ox.

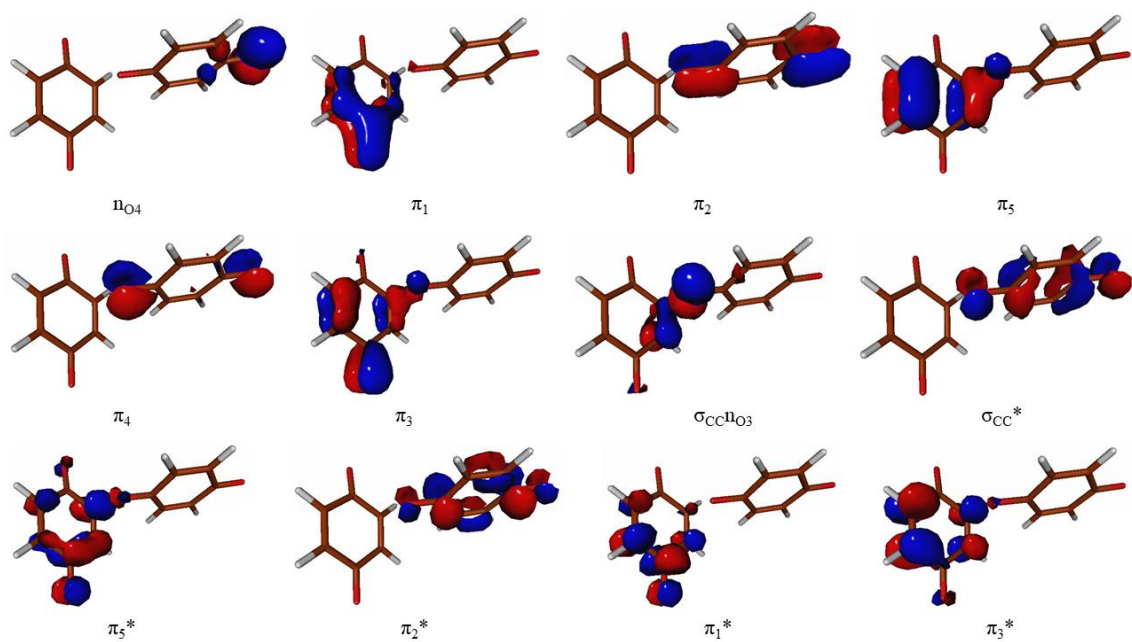

**Fig. S8** Natural orbitals of the CASSCF active space of the singlet and triplet states at the transition state structure (TS) for BQ-Ox.

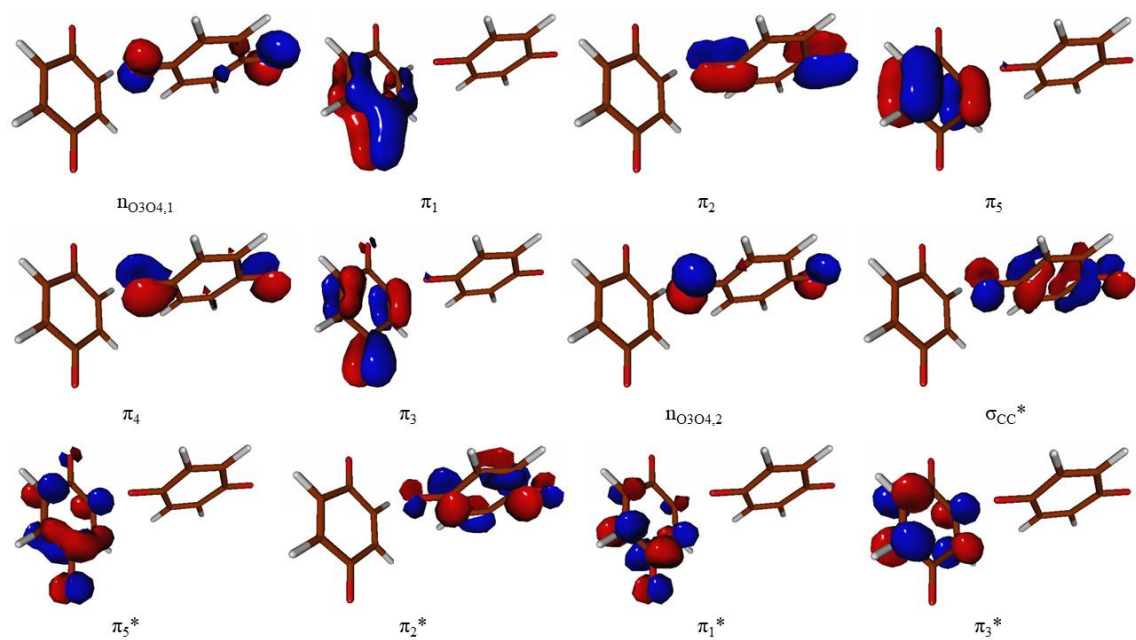

**Fig. S9** Natural orbitals of the CASSCF active space of the singlet and triplet states at the excimer structure ( $^3\text{EXC}^*$ ) for BQ-Ox.

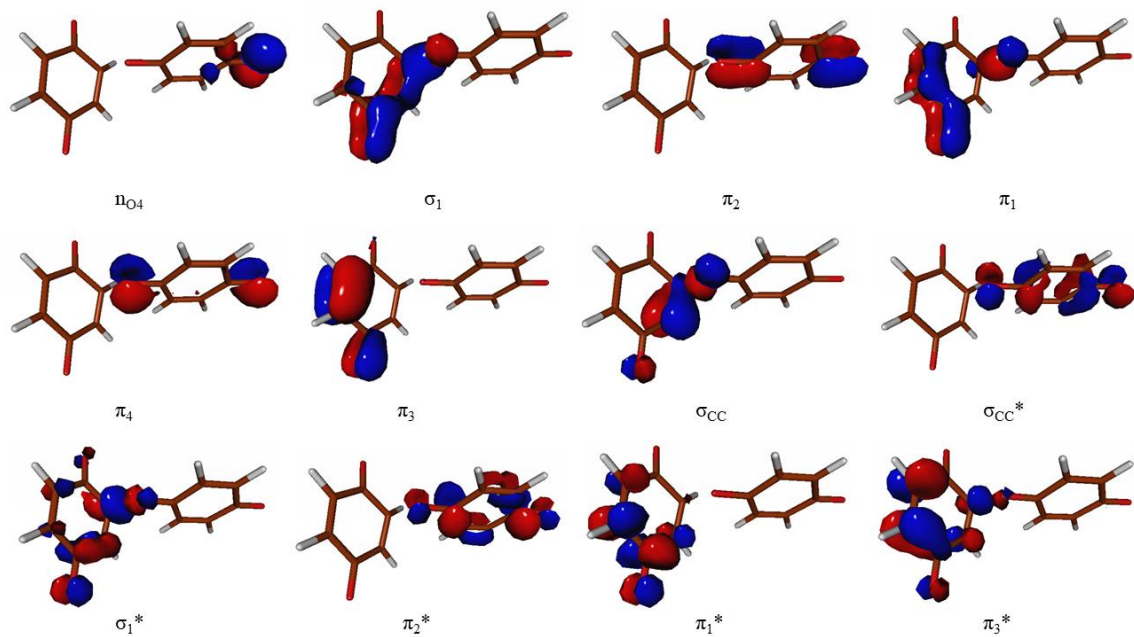

**Fig. S10** Natural orbitals of the CASSCF active space of the singlet and triplet states at the crossing point structure (CP) for BQ-Ox.

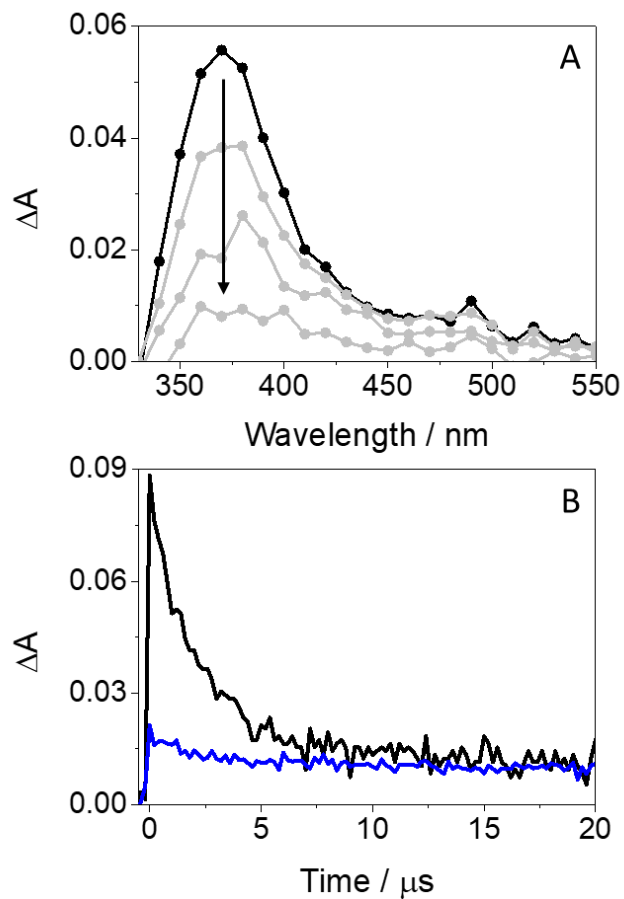

**Fig. S11** A) LFP transient absorption spectra for NQ at different times after the laser pulse (0.5, 2, 5 and 20  $\mu\text{s}$ ). B) Decay traces for NQ (black) and NQ-Ox (blue) at 370 nm. All measurements were performed in deaerated MeCN at  $\lambda_{\text{exc}} = 266$  nm.

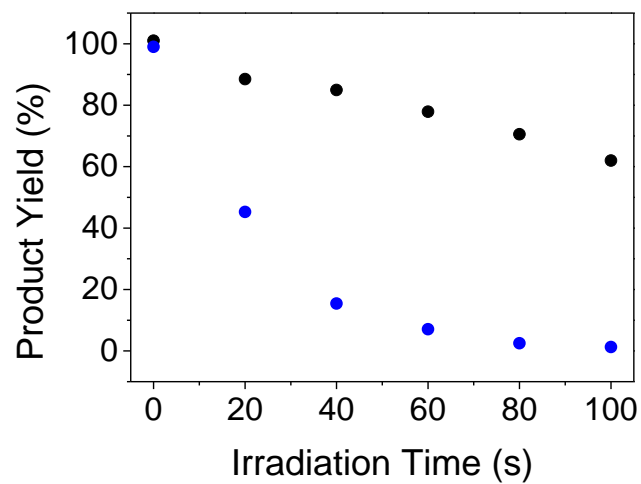

**Fig. S12** Degree of photodegradation for NQ (black) and NQ-Ox (blue) upon steady-state irradiation in deaerated MeCN using a multilamp photoreactor emitting at  $\lambda_{\text{max}} \sim 310$  nm.

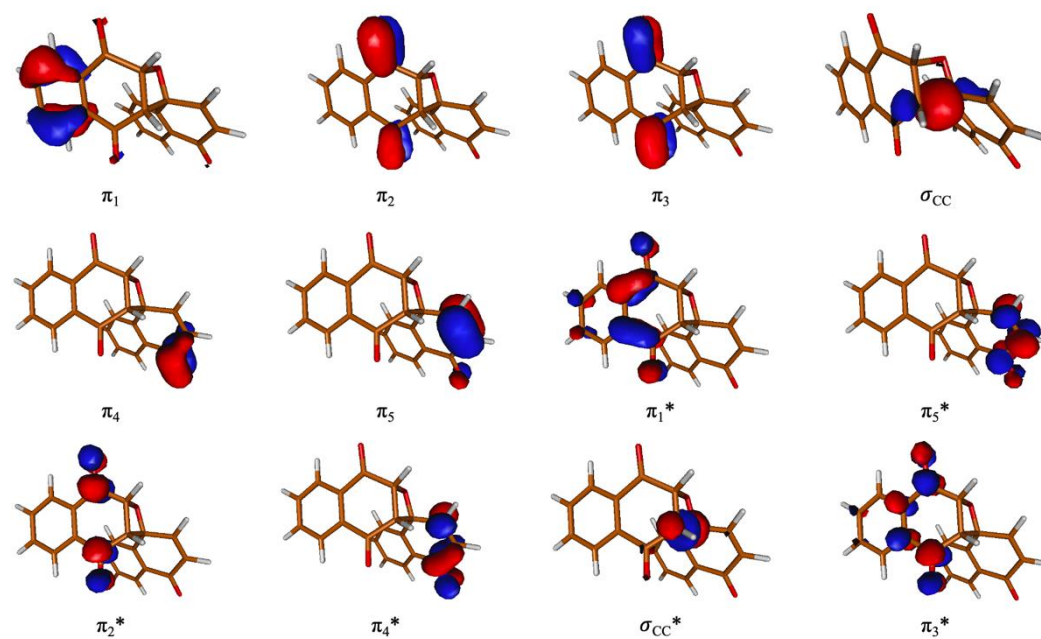

**Fig. S13** Natural orbitals of the CASSCF active space of the singlet states at the oxetane structure for NQ-Ox.



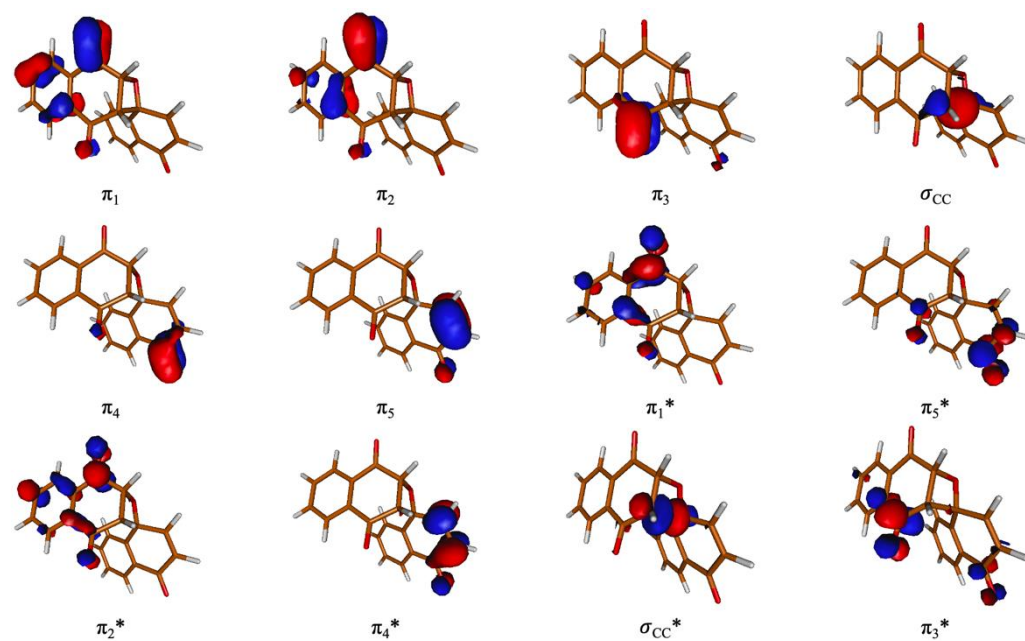

**Fig. S14** Natural orbitals of the CASSCF active space of the triplet states at the oxetane structure for NQ-Ox.

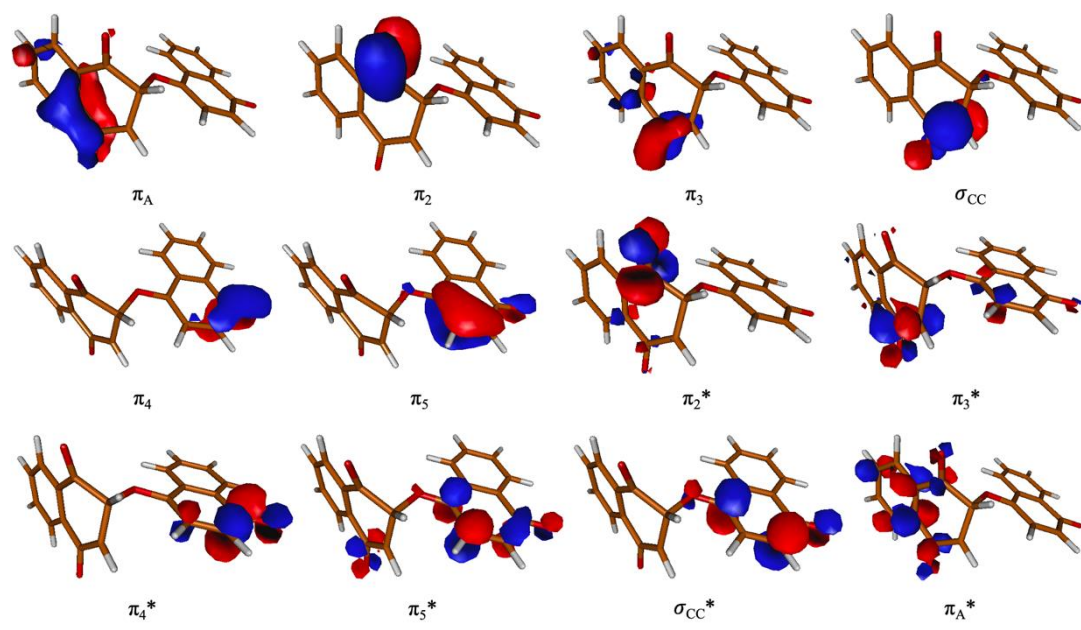

**Fig. S15** Natural orbitals of the CASSCF active space of the singlet and triplet states at the diradical structure ( $^3\text{NQ-Ox}^*$ ) for NQ-Ox.

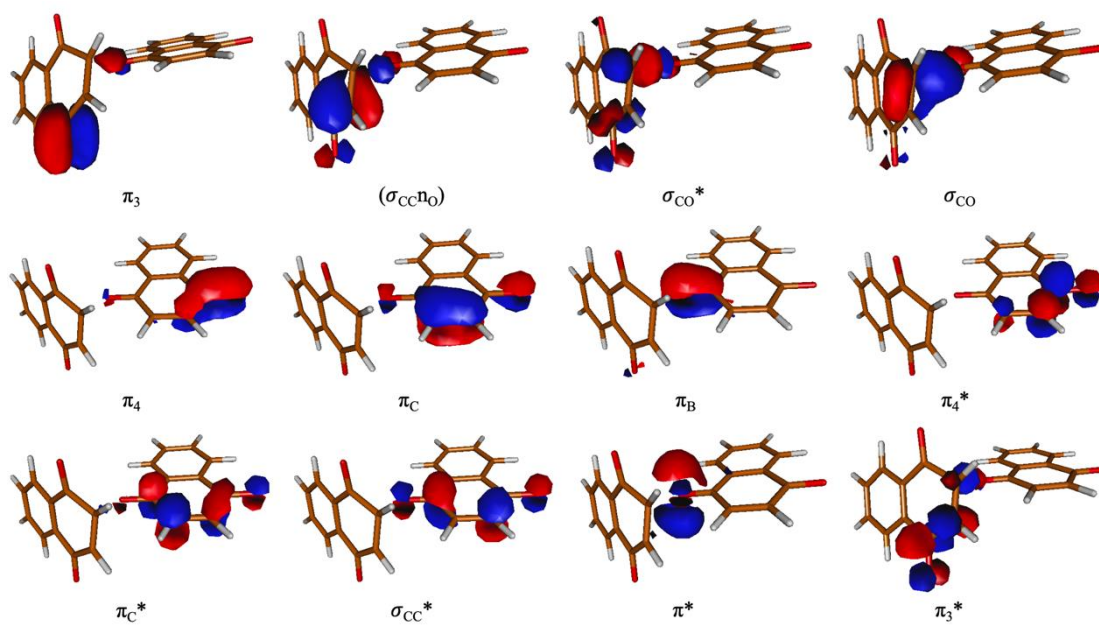

**Fig. S16** Natural orbitals of the CASSCF active space of the singlet states at the crossing point structure (CP) for NQ-Ox.

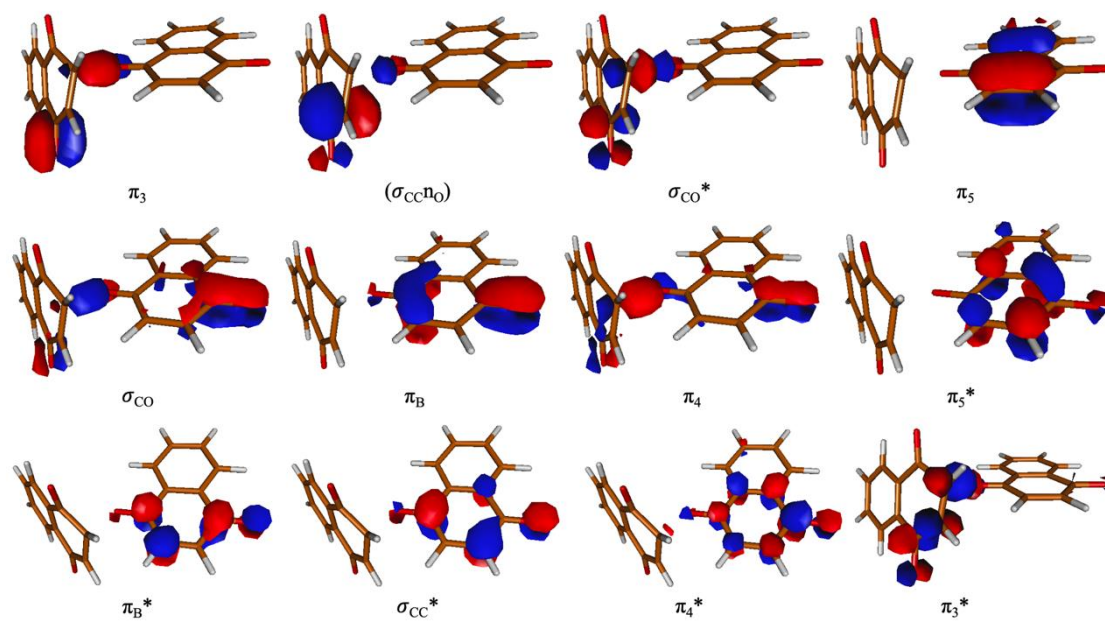

**Fig. S17** Natural orbitals of the CASSCF active space of the triplet states at the crossing point structure (CP) for NQ-Ox.

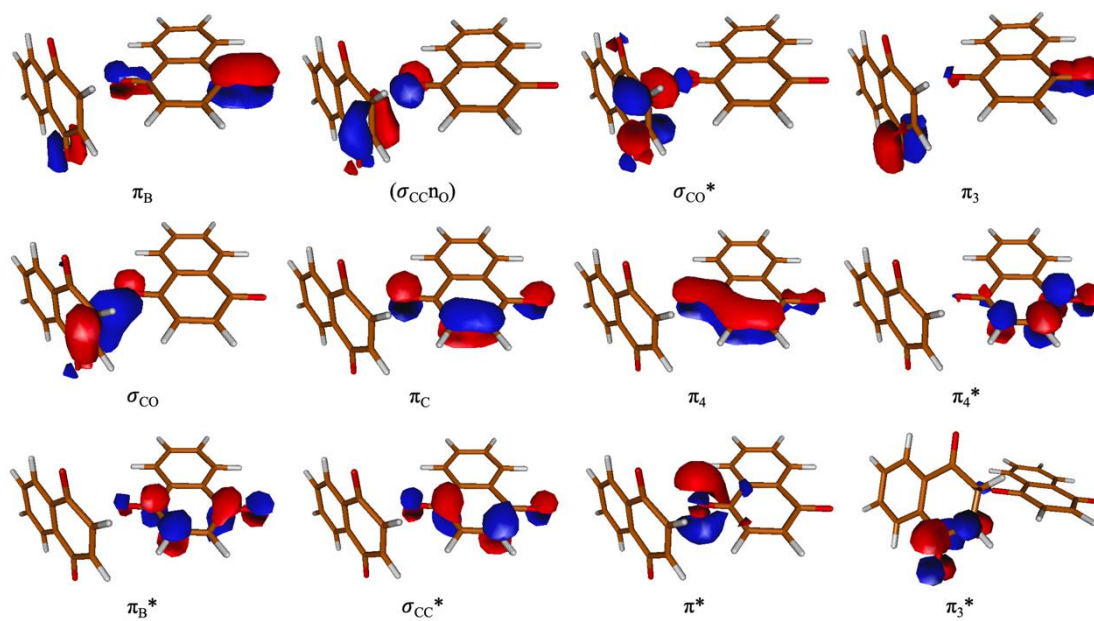

**Fig. S18** Natural orbitals of the CASSCF active space of the singlet states at the transition state structure (TS) for NQ-Ox.

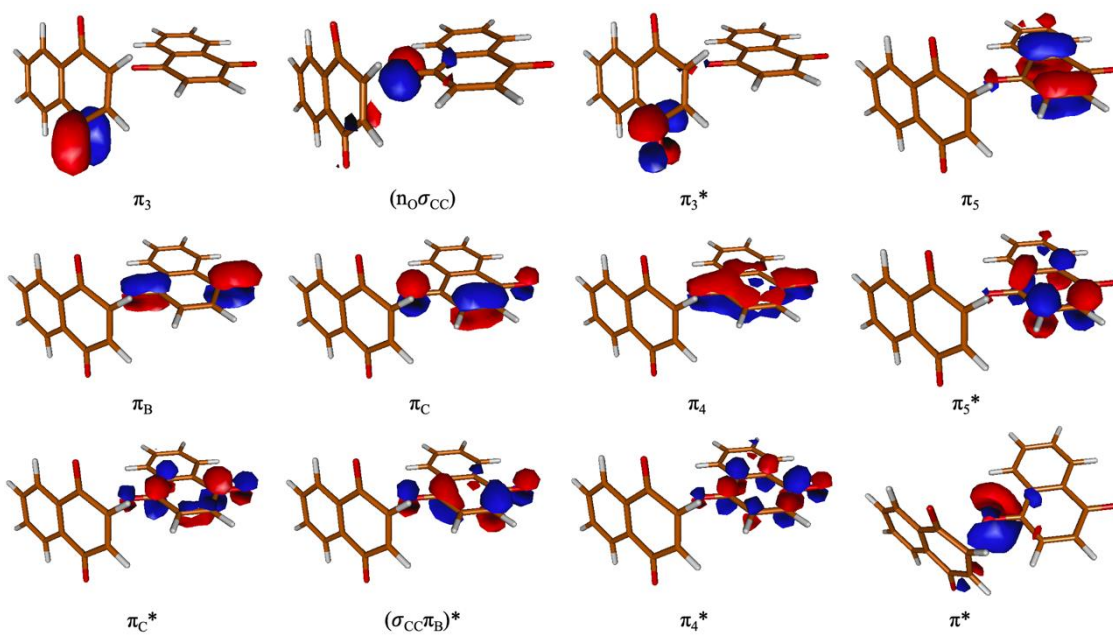

**Fig. S19** Natural orbitals of the CASSCF active space of the triplet states at the transition state structure (TS) for NQ-Ox.

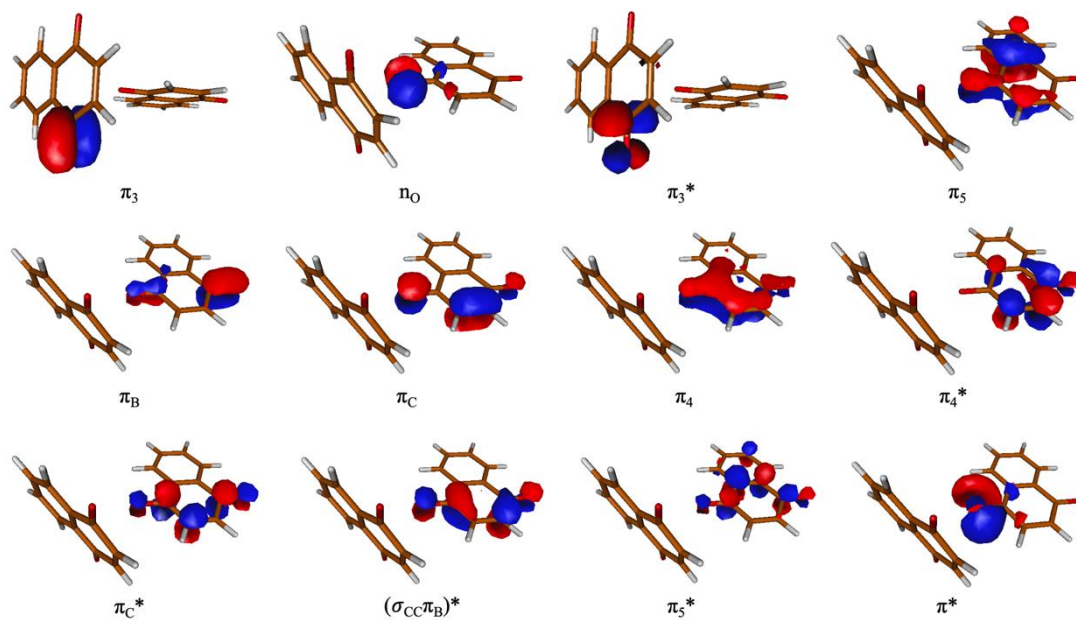

**Fig. S20** Natural orbitals of the CASSCF active space of the singlet and triplet states at the excimer structure ( ${}^3\text{EXC}^*$ ) for NQ-Ox.

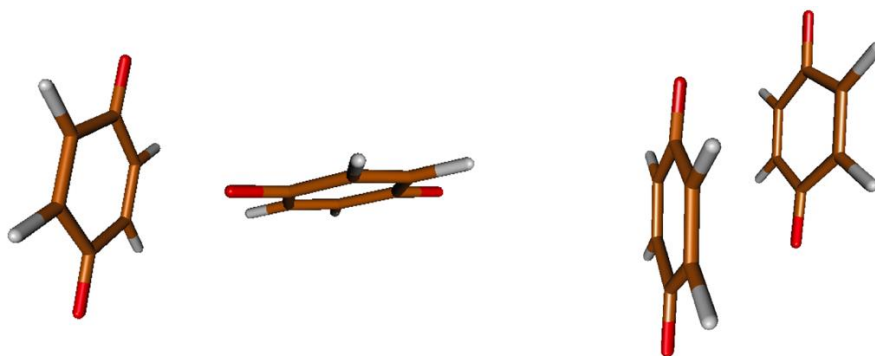

**Fig. S21** T-shape and parallel conformations of the  $^3\text{EXC}^*$  for BQ-Ox system.

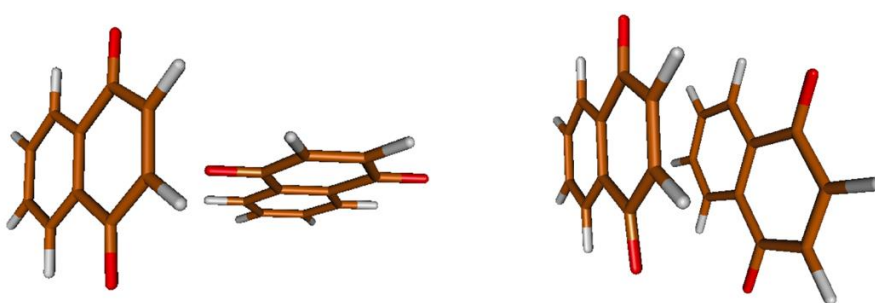

**Fig. S22** T-shape and parallel conformations of the  $^3\text{EXC}^*$  for NQ-Ox system.



**Table S1** Nature of the states in each relevant geometry for BQ-Ox: energies ( $E_v^{abs}$ ; in eV), weight of the main configuration state functions in the CASSCF wavefunction (%) and dipole moment ( $\mu$ ; in Debye). See shape of the natural orbitals in Figs. S4 to S9.

| Geometry            | State          | Nature                                                                                                                                                     | $E_v^{abs}$ | Weight               | $\mu$ |
|---------------------|----------------|------------------------------------------------------------------------------------------------------------------------------------------------------------|-------------|----------------------|-------|
| BQ-Ox               | S <sub>0</sub> | cs (HF) <sup>a</sup>                                                                                                                                       | -2.38       | 78.7                 | 2.00  |
|                     | S <sub>1</sub> | $n_{O1} \rightarrow \pi_2^*$                                                                                                                               | 0.98        | 67.6                 | 2.08  |
| <sup>3</sup> BQ-Ox* | S <sub>0</sub> | $\sigma_{CC} \rightarrow \sigma_{CC}^*$                                                                                                                    | -1.38       | 74.7                 | 3.66  |
|                     | S <sub>1</sub> | $n_{O4} \rightarrow \sigma_{CC}^*/\sigma_{CC} \rightarrow \sigma_{CC}^*$                                                                                   | 0.17        | 81.4                 | 0.97  |
|                     | T <sub>1</sub> | $\sigma_{CC} \rightarrow \sigma_{CC}^*$                                                                                                                    | -1.39       | 80.7                 | 3.63  |
| CP                  | S <sub>0</sub> | cs (HF) <sup>a</sup><br>$\sigma_{CC} \rightarrow \sigma_{CC}^*$                                                                                            | -0.87       | 53.3<br>14.7         | 1.80  |
|                     | S <sub>1</sub> | $\sigma_{CC} \rightarrow \sigma_{CC}^*$<br>cs (HF) <sup>a</sup><br>$\pi_4 \rightarrow \sigma_{CC}^*/\sigma_{CC} \rightarrow \sigma_{CC}^*$                 | -0.80       | 44.1<br>17.8<br>10.5 | 1.75  |
|                     | T <sub>1</sub> | $\sigma_{CC} \rightarrow \sigma_{CC}^*$<br>$\pi_4 \rightarrow \sigma_{CC}^*/\sigma_{CC} \rightarrow \sigma_{CC}^*$                                         | -0.80       | 58.8<br>12.8         | 3.97  |
|                     | S <sub>0</sub> | cs (HF) <sup>a</sup>                                                                                                                                       | -1.47       | 71.2                 | 2.07  |
| TS                  | S <sub>1</sub> | $\sigma_{CC}n_{O3} \rightarrow \sigma_{CC}^*$<br>$\pi_4 \rightarrow \sigma_{CC}^*/\sigma_{CC}n_{O3} \rightarrow \sigma_{CC}^*$                             | -0.40       | 58.0<br>16.6         | 2.99  |
|                     | T <sub>1</sub> | $\sigma_{CC}n_{O3} \rightarrow \sigma_{CC}^*$<br>$\pi_4 \rightarrow \sigma_{CC}^*/\sigma_{CC}n_{O3} \rightarrow \sigma_{CC}^*$                             | -0.53       | 59.1<br>15.2         | 2.97  |
|                     | S <sub>0</sub> | cs (HF) <sup>a</sup>                                                                                                                                       | -2.18       | 70.9                 | 0.91  |
| <sup>3</sup> EXC*   | S <sub>1</sub> | $n_{O3O4,2} \rightarrow \sigma_{CC}^*$<br>$n_{O3O4,1} \rightarrow \sigma_{CC}^*$<br>$\pi_4 \rightarrow \sigma_{CC}^*/n_{O3O4,2} \rightarrow \sigma_{CC}^*$ | -0.32       | 41.7<br>17.3<br>123  | 2.52  |
|                     | T <sub>1</sub> | $n_{O3O4,2} \rightarrow \sigma_{CC}^*$<br>$\pi_4 \rightarrow \sigma_{CC}^*/n_{O3O4,2} \rightarrow \sigma_{CC}^*$                                           | -0.53       | 51.8<br>13.6         | 2.60  |

**Table S2** Nature of the states in each relevant geometry for NQ-Ox: energies ( $E_v^{abs}$ ; in eV), weight of the main configuration state functions in the CASSCF wavefunction (%) and dipole moment ( $\mu$ ; in Debye). See shape of the natural orbitals in Figs. S11 to S18.

| Geometry            | State          | Nature                                                                                                       | $E_v^{abs}$ | Weight       | $\mu$ |
|---------------------|----------------|--------------------------------------------------------------------------------------------------------------|-------------|--------------|-------|
| NQ-Ox               | S <sub>0</sub> | cs (HF) <sup>a</sup>                                                                                         | -3.79       | 80.0         | 3.28  |
|                     | S <sub>1</sub> | $\pi_1 \rightarrow \pi_1^*$                                                                                  | 0.03        | 77.0         | 5.47  |
| <sup>3</sup> NQ-Ox* | S <sub>0</sub> | $\sigma_{CC} \rightarrow \sigma_{CC}^*$                                                                      | -2.32       | 67.7         | 3.90  |
|                     | S <sub>1</sub> | $\sigma_{CC} \rightarrow \sigma_{CC}^*/\pi_5 \rightarrow \sigma_{CC}^*$<br>$\sigma_{CC} \rightarrow \pi_5^*$ | -0.91       | 38.9<br>22.4 | 3.30  |
|                     | T <sub>1</sub> | $\sigma_{CC} \rightarrow \sigma_{CC}^*$                                                                      | -2.25       | 76.1         | 3.90  |
| CP                  | S <sub>0</sub> | $(\sigma_{CC}n_O) \rightarrow \sigma_{CC}^*$                                                                 | -1.76       | 71.1         | 4.55  |
|                     | S <sub>1</sub> | cs (HF) <sup>a</sup>                                                                                         | -1.75       | 65.3         | 5.78  |
|                     | T <sub>1</sub> | $(\sigma_{CC}n_O) \rightarrow \sigma_{CC}^*$                                                                 | -1.69       | 77.5         | 4.81  |
| TS                  | S <sub>0</sub> | cs (HF) <sup>a</sup>                                                                                         | -2.61       | 75.3         | 3.16  |
|                     | S <sub>1</sub> | $(\sigma_{CC}n_O) \rightarrow \sigma_{CC}^*$                                                                 | -1.34       | 68.1         | 4.12  |
|                     | T <sub>1</sub> | $(n_O\sigma_{CC}) \rightarrow \sigma_{CC}^*$                                                                 | -1.18       | 75.2         | 3.90  |
| <sup>3</sup> EXC*   | S <sub>0</sub> | cs (HF) <sup>a</sup>                                                                                         | -3.48       | 73.4         | 1.95  |
|                     | S <sub>1</sub> | $n_O \rightarrow (\sigma_{CC}\pi_B)^*$                                                                       | -1.28       | 74.0         | 3.88  |
|                     | T <sub>1</sub> | $n_O \rightarrow (\sigma_{CC}\pi_B)^*$                                                                       | -1.40       | 72.5         | 3.99  |

**Table S3** DFT and CASPT2 energies (in eV) of the T<sub>1</sub> state of both types of excimers of BQ-Ox and NQ-Ox. The energies are relative to their respective T-shape excimers.

|                 |                 | BQ-ox | NQ-ox |
|-----------------|-----------------|-------|-------|
| $E_{DFT,T1}$    | <b>T-shape</b>  | 0.00  | 0.00  |
|                 | <b>Parallel</b> | -0.19 | -0.28 |
| $E_{CASPT2,T1}$ | <b>T-shape</b>  | 0.00  | 0.00  |
|                 | <b>Parallel</b> | -0.08 | -1.19 |

## REFERENCES

- (1) Siegbahn, P. E. M.; Almlöf, J.; Heiberg, A.; Roos, B. O. The Complete Active Space SCF (CASSCF) Method in a Newton–Raphson Formulation with Application to the HNO Molecule. *J. Chem. Phys.* **1981**, *74*, 2384-2396.
- (2) Andersson, K.; Malmqvist, P. Å.; Roos, B. O. Second-Order Perturbation Theory with a Complete Active Space Self-Consistent Field Reference Function. *J. Chem. Phys.* **1992**, *96*, 1218-1226.
- (3) Frisch, M. J.; Trucks, G. W.; Schlegel, H. B.; Scuseria, G. E.; Robb, M. A.; Cheeseman, J. R.; Scalmani, G.; Barone, V.; Petersson, G. A.; Nakatsuji, H. et al. Gaussian 09, Revision D.01. Gaussian, Inc., Wallingford CT 2009.
- (4) Aquilante, F.; Autschbach, J.; Carlson, R. K.; Chibotaru, L. F.; Delcey, M. G.; De Vico, L.; Fdez.-Galván, I.; Ferré, N.; Frutos, L. M.; Gagliardi, L. et al. Molcas 8: New Capabilities for Multiconfigurational Quantum Chemical Calculations across the Periodic Table. *J. Comput. Chem.* **2016**, *37*, 506-541.
- (5) Ghigo, G.; Roos, B. O.; Malmqvist, P. Å. A Modified Definition of the Zeroth-Order Hamiltonian in Multiconfigurational Perturbation Theory (CASPT2). *Chem. Phys. Lett.* **2004**, *396*, 142-149.
- (6) Forsberg, N.; Malmqvist, P. Å. Multiconfiguration Perturbation Theory with Imaginary Level Shift. *Chem. Phys. Lett.* **1997**, *274*, 196-204.
